# Supplementary material
Source: PubMed Central journal article supplement (PMC3318055)
Supplement: supp_88.9.781_JDR340641_Online_Appendix_Rev1.pdf [file supp_88.9.781_JDR340641_Online_Appendix_Rev1.pdf]

X. Luan\*, S. Dangaria, Y. Ito, C.G. Walker, T. Jin, M.K. Schmidt, M.T. Galang, and R. Druzinsky

Brodie Laboratory for Craniofacial Genetics, Departments of Oral Biology and Orthodontics, UIC College of Dentistry, The University of Illinois at Chicago, 801 South Paulina, M/C 841, Chicago, IL 60612, USA; \*corresponding author, luan@uic.edu

*J Dent Res* 88(9):781-791, 2009

## APPENDIX

### APPENDIX REFERENCES

Acampora D, Merlo GR, Paleari L, Zerega B, Postiglione MP, Mantero S, *et al.* (1999). Craniofacial, vestibular and bone defects in mice lacking the Distal-less-related gene *Dlx5*. *Development* 126:3795-3809.

Akincıbay H, Şenel S, Ay ZY (2007). Application of chitosan gel in the treatment of chronic periodontitis. *J Biomed Mater Res B-Appl Biomater* 80:290-296.

Andrae J, Molander C, Smits A, Funa K, Nister M (2002). Platelet-derived growth factor-B and -C and active alpha-receptors in medulloblastoma cells. *Biochem Biophys Res Commun* 296:604-611.

Andrae J, Gallini R, Betsholtz C (2008). Role of platelet-derived growth factors in physiology and medicine. *Genes Dev* 22:1276-1312.

Anusaksathien O, Jin Q, Zhao M, Somerman MJ, Giannobile WV (2004). Effect of sustained gene delivery of platelet-derived growth factor or its antagonist (PDGF-1308) on tissue-engineered cementum. *J Periodontol* 75:429-440.

Asano M, Kubota S, Nakanishi T, Nishida T, Yamaai T, Yosimichi G, *et al.* (2005). Effect of connective tissue growth factor (CCN2/CTGF) on proliferation and differentiation of mouse periodontal ligament-derived cells. *Cell Commun Signal* 3:11.

Badylak SF (2002). The extracellular matrix as a scaffold for tissue reconstruction. *Semin Cell Dev Biol* 13:377-383.

Baelum V, Lopez R (2003). Defining and classifying periodontitis: need for a paradigm shift? *Eur J Oral Sci* 111:2-6.

Baker CVH (2005). Neural crest and cranial ectodermal placodes. In: *Developmental neurobiology*. 4th ed. Rao MS, Jacobson M, editors. New York: Kluwer Academic, Plenum Publishers, pp. 67-127.

Ballas CB, Zielske SP, Gerson SL (2002). Adult bone marrow stem cells for cell and gene therapies: implications for greater use. *J Cell Biochem Suppl* 38:20-28.

Barbosa MD, Gregh SL, Passanezi E (2007). Fibrin adhesive derived from snake venom in periodontal surgery. *J Periodontol* 78:2026-2031.

Barlow AJ, Bogardi JP, Ladher R, Francis-West PH (1999). Expression of chick *Barx-1* and its differential regulation by FGF-8 and BMP signaling in the maxillary primordia. *Dev Dyn* 214:291-302.

Bassett CA, Creighton DK Jr (1961). A possible substitute for the preserved bone homograft. *Surg Forum* 12:445-447.

Baum BJ, Mooney DJ (2000). The impact of tissue engineering on dentistry. *J Am Dent Assoc* 131:309-318.

Beertsen W, McCulloch CA, Sodek J (1997). The periodontal ligament: a unique, multifunctional connective tissue. *Periodontol* 2000 13:20-40.

Berkovitz B, Moxham BJ, Holland GR, editors (2002). *Oral anatomy, histology & embryology*. 3rd ed. Philadelphia, USA: Elsevier Health Sciences.

Boudreau NJ, Jones PL (1999). Extracellular matrix and integrin signalling: the shape of things to come. *Biochem J* 339(Pt 3):481-488.

Boyne PJ, Mikels TE (1968). Restoration of alveolar ridges by intramandibular transposition osseous grafting. *J Oral Surg* 26:569-576.

Brady TA, Piesco NP, Buckley MJ, Langkamp HH, Bowen LL, Agarwal S (1998). Autoregulation of periodontal ligament cell phenotype

# Neural Crest Lineage Segregation: a Blueprint for Periodontal Regeneration

and functions by transforming growth factor-beta1. *J Dent Res* 77: 1779-1790.

Buckley CD, Rainger GE, Bradfield PF, Nash GB, Simmons DL (1998). Cell adhesion: more than just glue (review). *Mol Membr Biol* 15:167-176.

Cen L, Liu W, Cui L, Zhang W, Cao Y (2008). Collagen tissue engineering: development of novel biomaterials and applications. *Pediatr Res* 63:492-496.

Chai Y, Jiang X, Ito Y, Bringas P Jr, Han J, Rowitch DH, *et al.* (2000). Fate of the mammalian cranial neural crest during tooth and mandibular morphogenesis. *Development* 127:1671-1679.

Chen FM, Zhao YM, Wu H, Deng ZH, Wang QT, Zhou W, *et al.* (2006). Enhancement of periodontal tissue regeneration by locally controlled delivery of insulin-like growth factor-I from dextran-co-gelatin microspheres. *J Control Release* 114:209-222.

Chen G, Ushida T, Tateishi T (2001). Poly(DL-lactic-co-glycolic acid) sponge hybridized with collagen microsponges and deposited apatite particulates. *J Biomed Mater Res* 57:8-14.

Chen G, Sato T, Ushida T, Ochiai N, Tateishi T (2004). Tissue engineering of cartilage using a hybrid scaffold of synthetic polymer and collagen. *Tissue Eng* 10:323-330.

Couly GF, Le Douarin NM (1987). Mapping of the early neural primordium in quail-chick chimeras. II. The prosencephalic neural plate and neural folds: implications for the genesis of cephalic human congenital abnormalities. *Dev Biol* 120:198-214.

Couly GF, Le Douarin NM (1990). Head morphogenesis in embryonic avian chimeras: evidence for a segmental pattern in the ectoderm corresponding to the neuromeres. *Development* 108:543-558.

Couly GF, Creuzet S, Bennaceur S, Vincent C, Le Douarin NM (2002). Interactions between Hox-negative cephalic neural crest cells and the foregut endoderm in patterning the facial skeleton in the vertebrate head. *Development* 129:1061-1073.

Coura GS, Garcez RC, de Aguiar CB, Alvarez-Silva M, Magini RS, Trentin AG (2008). Human periodontal ligament: a niche of neural crest stem cells. *J Periodontol Res* 43:531-536.

D'Errico JA, Ouyang H, Berry JE, MacNeil RL, Strayhorn C, Imperiale MJ, *et al.* (1999). Immortalized cementoblasts and periodontal ligament cells in culture. *Bone* 25:39-47.

D'Errico JA, Berry JE, Ouyang H, Strayhorn CL, Windle JJ, Somerman MJ (2000). Employing a transgenic animal model to obtain cementoblasts in vitro. *J Periodontol* 71:63-72.

Daculsi G, Layrolle P (2004). Osteoinductive properties of micro macroporous biphasic calcium phosphate bioceramics. *Key Eng Mater* 254-256: 1005-1008.

Depew MJ, Simpson CA, Morasso M, Rubenstein JL (2005). Reassessing the *Dlx* code: the genetic regulation of branchial arch skeletal pattern and development. *J Anat* 207:501-561.

Dereka XE, Markopoulou CE, Vrotsos IA (2006). Role of growth factors on periodontal repair. *Growth Factors* 24:260-267.

Diekwisch TG (2001). The developmental biology of cementum. *Int J Dev Biol* 45:695-706.

- Diekwisch TG (2002). Pathways and fate of migratory cells during late tooth organogenesis. *Connect Tissue Res* 43:245-256.
- Dogan A, Ozdemir A, Kubar A, Oygur T (2002). Assessment of periodontal healing by seeding of fibroblast-like cells derived from regenerated periodontal ligament in artificial furcation defects in a dog: a pilot study. *Tissue Eng* 8:273-282.
- English D (2006). Biochemical events involved in stem cell development. *Stem Cells Dev* 15:751-752.
- Esposito M, Grusovin MG, Coulthard P, Worthington HV (2005). Enamel matrix derivative (Emdogain) for periodontal tissue regeneration in intrabony defects. *Cochrane Database Syst Rev* 4:CD003875.
- Fabris G, Trombelli L, Schincaglia GP, Cavallini R, Calura G, del Senno L (1998). Effects of a fibrin-fibronectin sealing system on proliferation and type I collagen synthesis of human PDL fibroblasts in vitro. *J Clin Periodontol* 25:11-14.
- Ferguson CA, Tucker AS, Sharpe PT (2000). Temporospatial cell interactions regulating mandibular and maxillary arch patterning. *Development* 127:403-412.
- Fincham AG, Simmer JP (1997). Amelogenin proteins of developing dental enamel. *Ciba Found Symp* 205:118-130.
- Folkman J, Klagsbrun M (1987). Angiogenic factors. *Science* 235:442-447.
- Fong HK, Foster BL, Popowics TE, Somerman MJ (2005). The crowning achievement: getting to the root of the problem. *J Dent Educ* 69:555-570.
- Foster BL, Popowics TE, Fong HK, Somerman MJ (2007). Advances in defining regulators of cementum development and periodontal regeneration. *Curr Top Dev Biol* 78:47-126.
- Freeman E, Ten Cate AR (1971). Development of the periodontium: an electron microscopic study. *J Periodontol* 42:387-395.
- Friedman CD, Costantino PD, Takagi S, Chow LC (1998). BoneSource hydroxyapatite cement: a novel biomaterial for craniofacial skeletal tissue engineering and reconstruction. *J Biomed Mater Res* 43:428-432.
- Friedrichsen S, Heuer H, Christ S, Cuthill D, Bauer K, Raivich G (2005). Gene expression of connective tissue growth factor in adult mouse. *Growth Factors* 23:43-53.
- Fukui N, Sato T, Kuboki Y, Aoki H (2008). Bone tissue reaction of nano-hydroxyapatite/collagen composite at the early stage of implantation. *Biomed Mater Eng* 18:25-33.
- Fukumoto S, Kiba T, Hall B, Ichihara N, Nakamura Y, Longenecker G, et al. (2004). Ameloblastin is a cell adhesion molecules required for maintaining the differentiation state of ameloblasts. *J Cell Biol* 167:973-983.
- Genco RJ, Loe H (1993). The role of systemic conditions and disorders in periodontal disease. *Periodontol* 2000 2:98-116.
- Giannobile WV, Ryan S, Shih MS, Su DL, Kaplan PL, Chan TC (1998). Recombinant human osteogenic protein-1 (OP-1) stimulates periodontal wound healing in class III furcation defects. *J Periodontol* 69:129-137.
- Giannobile WV, Lee CS, Tomala MP, Tejada KM, Zhu Z (2001). Platelet-derived growth factor (PDGF) gene delivery for application in periodontal tissue engineering. *J Periodontol* 72:815-823.
- Gibson CW (2008). The amelogenin "enamel proteins" and cells in the periodontium. *Crit Rev Eukaryot Gene Expr* 18:345-360.
- Gottlow J, Nyman S, Karring T, Lindhe J (1984). New attachment formation as the result of controlled tissue regeneration. *J Clin Periodontol* 11:494-503.
- Gottlow J, Nyman S, Lindhe J, Karring T, Wennström J (1986). New attachment formation in the human periodontium by guided tissue regeneration. Case reports. *J Clin Periodontol* 13:604-616.
- Gronthos S, Mankani M, Ibrahim J, Robey PG, Shi S (2000). Postnatal human dental pulp stem cells (DPSCs) in vitro and in vivo. *Proc Natl Acad Sci USA* 97:13625-13630.
- Grzesik WJ, Ivanov B, Robey FA, Southerland J, Yamauchi M (1998). Synthetic integrin-binding peptides promote adhesion and proliferation of human periodontal ligament cells in vitro. *J Dent Res* 77:1606-1612.
- Grzesik WJ, Cheng H, Oh JS, Kuznetsov SA, Mankani MH, Uzawa K, et al. (2000). Cementum-forming cells are phenotypically distinct from bone-forming cells. *J Bone Miner Res* 15:52-59.
- Gunatillake PA, Adhikari R (2003). Biodegradable synthetic polymers for tissue engineering. *Eur Cell Mater* 5:1-16.
- Gunatillake PA, Meijs GF, McCarthy SJ (2001). Developments in design and synthesis of biostable polyurethanes. In: Biomedical applications of polyurethanes. Vermette P, Griesser HJ, Laroche G, Guidoin R, editors. Washington, DC: Landes Bioscience, pp. 160-170.
- Haase HR, Bartold PM (2001). Enamel matrix derivative induces matrix synthesis by cultured human periodontal fibroblast cells. *J Periodontol* 72:341-348.
- Hakki SS, Berry JE, Somerman MJ (2001). The effect of enamel matrix protein derivative on follicle cells in vitro. *J Periodontol* 72:679-687.
- Hamamoto Y, Kawasaki N, Jarnbring F, Hammarström L (2002). Effects and distribution of the enamel matrix derivative Emdogain in the periodontal tissues of rat molars transplanted to the abdominal wall. *Dent Traumatol* 18:12-23.
- Hammarström L, Alatalo I, Fong CD (1996). Origins of cementum. *Oral Dis* 2:63-69.
- Handa K, Saito M, Tsunoda A, Yamauchi M, Hattori S, Sato S, et al. (2002). Progenitor cells from dental follicle are able to form cementum matrix in vivo. *Connect Tissue Res* 43:406-408.
- Harada H, Kettunen P, Jung HS, Mustonen T, Wang YA, Thesleff I (1999). Localization of putative stem cells in dental epithelium and their association with Notch and FGF signaling. *J Cell Biol* 147:105-120.
- Hardwick R, Hayes BK, Flynn C (1995). Devices for dentoalveolar regeneration: an up-to-date literature review. *J Periodontol* 66:495-505.
- Hayashi T (1994). Biodegradable polymers for biomedical uses. *Progr Polymer Sci* 19:663-702.
- Heijl L, Heden G, Svardström G, Ostgren A (1997). Enamel matrix derivative (EMDOGAIN) in the treatment of intrabony periodontal defects. *J Clin Periodontol* 24:705-714.
- Heldin CH, Westermark B (1999). Mechanism of action and in vivo role of platelet-derived growth factor. *Physiol Rev* 79:1283-1316.
- Helms JA, Schneider RA (2003). Cranial skeletal biology. *Nature* 423:326-331.
- Henderson DJ, Copp AJ (1997). Role of the extracellular matrix in neural crest cell migration. *J Anat* 191(Pt 4):507-515.
- Hoch RV, Soriano P (2003). Roles of PDGF in animal development. *Development* 130:4769-4784.
- Hou LT, Liu CM, Lei JY, Wong MY, Chen JK (2000). Biological effects of cementum and bone extracts on human periodontal fibroblasts. *J Periodontol* 71:1100-1109.
- Howell JM, Chisholm CD (1997). Wound care. *Emerg Med Clin North Am* 15:417-425.
- Hung RW, Chow AW (2004). Dissecting the "end game": clinical relevance, molecular mechanisms and laboratory assessment of apoptosis. *Clin Invest Med* 27:324-344.
- Hurley LA, Stinchfield FE, Bassett AL, Lyon WH (1959). The role of soft tissues in osteogenesis. An experimental study of canine spine fusions. *J Bone Joint Surg Am* 41(A):1243-1254.
- Hutmacher DW, Sittinger M, Risbud MV (2004). Scaffold-based tissue engineering: rationale for computer-aided design and solid free-form fabrication systems. *Trends Biotechnol* 22:354-362.
- Ignatius AA, Ohnmacht M, Claes LE, Kreidler J, Palm F (2001). A composite polymer/tricalcium phosphate membrane for guided bone regeneration in maxillofacial surgery. *J Biomed Mater Res* 58:564-569.
- Ikinci G, Şenel S, Akıncıbay H, Kas S, Ercis S, Wilson CG, et al. (2002). Effect of chitosan on a periodontal pathogen *Porphyromonas gingivalis*. *Int J Pharm* 235:121-127.
- Inanc B, Elcin AE, Elcin YM (2006). Osteogenic induction of human periodontal ligament fibroblasts under two- and three-dimensional culture conditions. *Tissue Eng* 12:257-266.
- Jiang Y, Vaessen B, Lenvik T, Blackstad M, Reyes M, Verfaillie CM (2002). Multipotent progenitor cells can be isolated from postnatal murine bone marrow, muscle, and brain. *Exp Hematol* 30:896-904.
- Jin Q, Anusaksathien O, Webb SA, Printz MA, Giannobile WV (2004). Engineering of tooth-supporting structures by delivery of PDGF gene therapy vectors. *Mol Ther* 9:519-526.
- Johansson CB, Momma S, Clarke DL, Risling M, Lendahl U, Frisen J (1999). Identification of a neural stem cell in the adult mammalian central nervous system. *Cell* 96:25-34.

- Johnson RB (2005). Synthesis of alveolar bone Sharpey's fibers during experimental tooth movement in the rat. *Anat Rec A: Discov Mol Cell Evol Biol* 284:485-490.
- Kawano S, Saito M, Handa K, Morotomi T, Toyono T, Seta Y, *et al.* (2004). Characterization of dental epithelial progenitor cells derived from cervical-loop epithelium in a rat lower incisor. *J Dent Res* 83:129-133.
- Kemoun P, Laurencin-Dalicioux S, Rue J, Farges JC, Gennero I, Conte-Auriol F, *et al.* (2007). Human dental follicle cells acquire cementoblast features under stimulation by BMP-2/-7 and enamel matrix derivatives (EMD) in vitro. *Cell Tissue Res* 329:283-294.
- Kharas GB, Kamenetsky M, Simantirakis J, Beinlich KC, Rizzo AMT, Caywood GA, *et al.* (1997). Synthesis and characterization of fumarate-based polyesters for use in bioresorbable bone cement composites. *J Appl Polym Sci* 66:1123-1137.
- Kim IY, Jung UW, Kim CS, Lee YK, Cho KS, Chai JK, *et al.* (2007). Effects of a tetracycline blended polylactic and polyglycolic acid membrane on the healing of one-wall intrabony defects in beagle dogs. *Biomed Mater* 2:106-110.
- Kim IY, Seo SJ, Moon HS, Yoo MK, Park IY, Kim BC, *et al.* (2008). Chitosan and its derivatives for tissue engineering applications. *Biotechnol Adv* 26:1-21.
- Kim UJ, Park J, Kim HJ, Wada M, Kaplan DL (2005). Three-dimensional aqueous-derived biomaterial scaffolds from silk fibroin. *Biomaterials* 26:2775-2785.
- King GN, King N, Hughes FJ (1998). The effect of root surface demineralization on bone morphogenetic protein-2-induced healing of rat periodontal fenestration defects. *J Periodontol* 69:561-570.
- King KR, Wang S, Irimia D, Jayaraman A, Toner M, Yarmush ML (2007). A high-throughput microfluidic real-time gene expression living cell array. *Lab Chip* 7:77-85.
- Kino R, Ikoma T, Yunoki S, Nagai N, Tanaka J, Asakura T, *et al.* (2007). Preparation and characterization of multilayered hydroxyapatite/silk fibroin film. *J Biosci Bioeng* 103:514-520.
- Kitamura M, Nakashima K, Kowashi Y, Fujii T, Shimauchi H, Sasano T, *et al.* (2008). Periodontal tissue regeneration using fibroblast growth factor-2: randomized controlled phase II clinical trial. *PLoS ONE* 3:e2611.
- Klagsbrun M (1989). The fibroblast growth factor family: structural and biological properties. *Prog Growth Factor Res* 1:207-235.
- Knecht AK, Bronner-Fraser M (2002). Induction of the neural crest: a multigene process. *Nat Rev Genet* 3:453-461.
- Knight RD, Schilling TF (2006). Cranial neural crest and development of the head skeleton. *Adv Exp Med Biol* 589:120-133.
- Knippenberg M, Helder MN, Zandieh Doulabi B, Wuisman PI, Klein-Nulend J (2006). Osteogenesis versus chondrogenesis by BMP-2 and BMP-7 in adipose stem cells. *Biochem Biophys Res Commun* 342:902-908.
- Kohn J, Abramson S, Langer R (1996). Bioresorbable and bioerodible materials. In: *Biomaterials science*. Ratner BD, Hoffman AS, Schoen FS, Lemons JE, editors. San Diego, CA: Elsevier, pp. 115-126.
- Kozarsky KF, Wilson JM (1993). Gene therapy: adenovirus vectors. *Curr Opin Genet Dev* 3:499-503.
- Kurtis B, Unsal B, Cetiner D, Gultekin E, Ozcan G, Celebi N, *et al.* (2002). Effect of polylactide/glycolide (PLGA) membranes loaded with metronidazole on periodontal regeneration following guided tissue regeneration in dogs. *J Periodontol* 73:694-700.
- Lange TA, Zerwekh JE, Peek RD, Mooney V, Harrison BH (1986). Granular tricalcium phosphate in large cancellous defects. *Ann Clin Lab Sci* 16:467-472.
- Langer R, Vacanti JP (1993). Tissue engineering. *Science* 260:920-926.
- Larsson S, Bauer TW (2002). Use of injectable calcium phosphate cement for fracture fixation: a review. *Clin Orthop Relat Res* 395:23-32.
- Laurell L, Falk H, Fornell J, Johard G, Gottlow J (1994). Clinical use of a bioresorbable matrix barrier in guided tissue regeneration therapy. Case series. *J Periodontol* 65:967-975.
- Laurencin C, Domb A, Morris C, Brown V, Chasin M, McConnell R, *et al.* (1990). Poly(anhydride) administration in high doses in vivo: studies of biocompatibility and toxicology. *J Biomed Mater Res* 24:1463-1481.
- Lawson DA, Xin L, Lukacs RU, Cheng D, Witte ON (2007). Isolation and functional characterization of murine prostate stem cells. *Proc Natl Acad Sci USA* 104:181-186.
- Le Douarin NM (2004). The avian embryo as a model to study the development of the neural crest: a long and still ongoing story. *Mech Dev* 121:1089-1102.
- Lee YM, Seol YJ, Lim YT, Kim S, Han SB, Rhyu IC, *et al.* (2001). Tissue-engineered growth of bone by marrow cell transplantation using porous calcium metaphosphate matrices. *J Biomed Mater Res* 54:216-223.
- Lester KS (1969a). The incorporation of epithelial cells by cementum. *J Ultrastruct Res* 27:63-87.
- Lester KS (1969b). The unusual nature of root formation in molar teeth of the laboratory rat. *J Ultrastruct Res* 28:481-506.
- Li H, Fredriksson L, Li X, Eriksson U (2003). PDGF-D is a potent transforming and angiogenic growth factor. *Oncogene* 22:1501-1510.
- Lin BR, Chang CC, Che TF, Chen ST, Chen RJ, Yang CY, *et al.* (2005). Connective tissue growth factor inhibits metastasis and acts as an independent prognostic marker in colorectal cancer. *Gastroenterology* 128:9-23.
- Lin CG, Leu SJ, Chen N, Tebeau CM, Lin SX, Yeung CY, *et al.* (2003). CCN3 (NOV) is a novel angiogenic regulator of the CCN protein family. *J Biol Chem* 278:24200-24208.
- Liu HW, Yacobi R, Savion N, Narayanan AS, Pitaru S (1997). A collagenous cementum-derived attachment protein is a marker for progenitors of the mineralized tissue-forming cell lineage of the periodontal ligament. *J Bone Miner Res* 12:1691-1699.
- Lo L, Anderson DJ (1995). Postmigratory neural crest cells expressing c-RET display restricted developmental and proliferative capacities. *Neuron* 15:527-539.
- Luan X, Ito Y, Holliday S, Walker C, Daniel J, Galang TM, *et al.* (2007). Extracellular matrix-mediated tissue remodeling following axial movement of teeth. *J Histochem Cytochem* 55:127-140.
- Lumsden AG (1988). Spatial organization of the epithelium and the role of neural crest cells in the initiation of the mammalian tooth germ. *Development* 103(Suppl):155-169.
- Luo W, Slavkin HC, Snead ML (1991). Cells from Hertwig's epithelial root sheath do not transcribe amelogenin. *J Periodontol Res* 26:42-47.
- Madan AK, Kramer B (2005). Immunolocalization of fibroblast growth factor-2 (FGF-2) in the developing root and supporting structures of the murine tooth. *J Mol Histol* 36:171-178.
- Manjubala I, Sastry TP, Kumar RV (2005). Bone in-growth induced by biphasic calcium phosphate ceramic in femoral defect of dogs. *J Biomater Appl* 19:341-360.
- Mano JF, Silva GA, Azevedo HS, Malafaya PB, Sousa RA, Silva SS, *et al.* (2007). Natural origin biodegradable systems in tissue engineering and regenerative medicine: present status and some moving trends. *J R Soc Interface* 4:999-1030.
- Massagué J, Wotton D (2000). Transcriptional control by the TGF-beta/Smad signaling system. *EMBO J* 19:1745-1754.
- McGonnell IM, Graham A (2002). Trunk neural crest has skeletogenic potential. *Curr Biol* 12:767-771.
- Meikle MC (2007). On the transplantation, regeneration and induction of bone: the path to bone morphogenetic proteins and other skeletal growth factors. *Surgeon* 5:232-243.
- Melcher AH (1970). Repair of wounds in the periodontium of the rat. Influence of periodontal ligament on osteogenesis. *Arch Oral Biol* 15:1183-1204.
- Melcher AH, McCulloch CA, Cheong T, Nemeth E, Shiga A (1987). Cells from bone synthesize cementum-like and bone-like tissue in vitro and may migrate into periodontal ligament in vivo. *J Periodontol Res* 22:246-247.
- Morsczeck C, Gotz W, Schierholz J, Zellhofer F, Kuhn U, Mohl C, *et al.* (2005). Isolation of precursor cells (PCs) from human dental follicle of wisdom teeth. *Matrix Biol* 24:155-165.
- Moussad EE, Brigstock DR (2000). Connective tissue growth factor: what's in a name? *Mol Genet Metab* 71:276-292.
- Muggli DS, Burkoth AK, Keyser SA, Lee HR, Anseth KS (1998). Reaction behavior of biodegradable, photo-cross-linkable polyanhydrides. *Macromolecules* 31:4120-4125.

- Mukherjee DP, Tunkle AS, Roberts RA, Clavenna A, Rogers S, Smith D (2003). An animal evaluation of a paste of chitosan glutamate and hydroxyapatite as a synthetic bone graft material. *J Biomed Mater Res B Appl Biomater* 67:603-609.
- Murakami S, Takayama S, Kitamura M, Shimabukuro Y, Kitamura M, Nozaki T, *et al.* (1999). Regeneration of periodontal tissues by basic fibroblast growth factor. *J Periodontol Res* 34:425-430.
- Murakami S, Takayama S, Kitamura M, Shimabukuro Y, Yanagi K, Ikezawa K, *et al.* (2003). Recombinant human basic fibroblast growth factor (bFGF) stimulates periodontal regeneration in class II furcation defects created in beagle dogs. *J Periodontol Res* 38:97-103.
- Nakahara T, Nakamura T, Kobayashi E, Inoue M, Shigeno K, Tabata Y, *et al.* (2003). Novel approach to regeneration of periodontal tissues based on in situ tissue engineering: effects of controlled release of basic fibroblast growth factor from a sandwich membrane. *Tissue Eng* 9:153-162.
- Nyman R, Magnusson M, Sennerby L, Nyman S, Lundgren D (1995). Membrane-guided bone regeneration. Segmental radius defects studied in the rabbit. *Acta Orthop Scand* 66:169-173.
- Ohyama M, Suzuki N, Yamaguchi Y, Maeno M, Otsuka K, Ito K (2002). Effect of enamel matrix derivative on the differentiation of C2C12 cells. *J Periodontol* 73:543-550.
- Okamoto Y, Shibasaki K, Minami S, Matsuhashi A, Tanioka S, Shigemasa Y (1995). Evaluation of chitin and chitosan on open wound healing in dogs. *J Vet Med Sci* 57:851-854.
- Ouyang H, McCauley LK, Berry JE, D'Errico JA, Strayhorn CL, Somerman MJ (2000a). Response of immortalized murine cementoblasts/periodontal ligament cells to parathyroid hormone and parathyroid hormone-related protein in vitro. *Arch Oral Biol* 45:293-303.
- Ouyang H, McCauley LK, Berry JE, Saygin NE, Tokiyasu Y, Somerman MJ (2000b). Parathyroid hormone-related protein regulates extracellular matrix gene expression in cementoblasts and inhibits cementoblast-mediated mineralization in vitro. *J Bone Miner Res* 15:2140-2153.
- Owens PD (1978). Ultrastructure of Hertwig's epithelial root sheath during early root development in premolar teeth in dogs. *Arch Oral Biol* 23:91-104.
- Palmer RM, Lumsden AG (1987). Development of periodontal ligament and alveolar bone in homografted recombinations of enamel organs and papillary, pulpal and follicular mesenchyme in the mouse. *Arch Oral Biol* 32:281-289.
- Palmon A, Roos H, Reichenberg E, Grosskop A, Bar Kana I, Pitaru S, *et al.* (2001). Basic fibroblast growth factor suppresses tropoelastin gene expression in cultured human periodontal fibroblasts. *J Periodontol Res* 36:65-70.
- Park H, Cannizzaro C, Vunjak-Novakovic G, Langer R, Vacanti CA, Farokhzad OC (2007). Nanofabrication and microfabrication of functional materials for tissue engineering. *Tissue Eng* 13:1867-1877.
- Park JS, Choi SH, Moon IS, Cho KS, Chai JK, Kim CK (2003). Eight-week histological analysis on the effect of chitosan on surgically created one-wall intrabony defects in beagle dogs. *J Clin Periodontol* 30:443-453.
- Paynter KJ, Pudy G (1958). A study of the structure, chemical nature, and development of cementum in the rat. *Anat Rec* 131:233-251.
- Pierret C, Spears K, Maruniak JA, Kirk MD (2006). Neural crest as the source of adult stem cells. *Stem Cells Dev* 15:286-291.
- Pierschbacher MD, Ruoslahti E (1984). Variants of the cell recognition site of fibronectin that retain attachment-promoting activity. *Proc Natl Acad Sci USA* 81:5985-5988.
- Pinchuk L (1994). A review of the biostability and carcinogenicity of polyurethanes in medicine and the new generation of 'biostable' polyurethanes. *J Biomater Sci Polym Ed* 6:225-267.
- Pitaru S, Savion N, Hekmati H, Olson S, Narayanan SA (1993). Molecular and cellular interactions of a cementum attachment protein with periodontal cells and cementum matrix components. *J Periodontol Res* 28:560-562.
- Pitaru S, McCulloch CA, Narayanan SA (1994). Cellular origins and differentiation control mechanisms during periodontal development and wound healing. *J Periodontol Res* 29:81-94.
- Planque N, Perbal B (2003). A structural approach to the role of CCN (CYR61/CTGF/NOV) proteins in tumorigenesis. *Cancer Cell Int* 3:15.
- Qiu M, Bulfone A, Ghattas I, Meneses JJ, Christensen L, Sharpe PT, *et al.* (1997). Role of the *Dlx* homeobox genes in proximodistal patterning of the branchial arches: mutations of *Dlx-1*, *Dlx-2*, and *Dlx-1* and *-2* alter morphogenesis of proximal skeletal and soft tissue structures derived from the first and second arches. *Dev Biol* 185:165-184.
- Rivera-Perez JA, Wakamiya M, Behringer RR (1999). Goosecoid acts cell autonomously in mesenchyme-derived tissues during craniofacial development. *Development* 126:3811-3821.
- Rossa C Jr, Marcantonio E Jr, Cirelli JA, Marcantonio RA, Spolidorio LC, Fogo JC (2000). Regeneration of Class III furcation defects with basic fibroblast growth factor (b-FGF) associated with GTR. A descriptive and histometric study in dogs. *J Periodontol* 71:775-784.
- Ruoslahti E (1996). RGD and other recognition sequences for integrins. *Annu Rev Cell Dev Biol* 12:697-715.
- Sachlos E, Czernuszka JT (2003). Making tissue engineering scaffolds work. Review: the application of solid freeform fabrication technology to the production of tissue engineering scaffolds. *Eur Cell Mater* 5:29-39.
- Sarment DP, Cooke JW, Miller SE, Jin Q, McGuire MK, Kao RT, *et al.* (2006). Effect of rhPDGF-BB on bone turnover during periodontal repair. *J Clin Periodontol* 33:135-140.
- Satokata I, Maas R (1994). *Mx1* deficient mice exhibit cleft palate and abnormalities of craniofacial and tooth development. *Nat Genet* 6:348-356.
- Saygin NE, Giannobile WV, Somerman MJ (2000). Molecular and cell biology of cementum. *Periodontol* 2000 24:73-98.
- Schroeder HE (1986). The periodontium. Berlin, Germany: Springer-Verlag.
- Schroeder HE, Luder HU, Bosshardt DD. (1992). Morphological and labeling evidence supporting and extending a modern theory of tooth eruption. *Schweiz Monatschr Zahnmed* 102:20-31.
- Sculean A, Pietruska M, Schwarz F, Willershausen B, Arweiler NB, Auschill TM (2005). Healing of human intrabony defects following regenerative periodontal therapy with an enamel matrix protein derivative alone or combined with a bioactive glass. A controlled clinical study. *J Clin Periodontol* 32:111-117.
- Selvig KA, Sorensen RG, Wozney JM, Wikesjö UM (2002). Bone repair following recombinant human bone morphogenetic protein-2 stimulated periodontal regeneration. *J Periodontol* 73:1020-1029.
- Semino CE (2003). Can we build artificial stem cell compartments? *J Biomed Biotechnol* 2003:164-169.
- Seo BM, Miura M, Gronthos S, Bartold PM, Batouli S, Brahimi J, *et al.* (2004). Investigation of multipotent postnatal stem cells from human periodontal ligament. *Lancet* 364:149-155.
- Serbedzija GN, Bronner-Fraser M, Fraser SE (1992). Vital dye analysis of cranial neural crest cell migration in the mouse embryo. *Development* 116:297-307.
- Serhan CN, Levy B (2003). Novel pathways and endogenous mediators in anti-inflammation and resolution. *Chem Immunol Allergy* 83:115-145.
- Sharpe PT (2001). Fish scale development: hair today, teeth and scales yesterday? *Curr Biol* 11:751-752.
- Shimo T, Wu C, Billings PC, Piddington R, Rosenbloom J, Pacifici M, *et al.* (2002). Expression, gene regulation, and roles of Fisp12/CTGF in developing tooth germs. *Dev Dyn* 224:267-278.
- Shimono M, Ishikawa T, Ishikawa H, Matsuzaki H, Hashimoto S, Muramatsu T, *et al.* (2003). Regulatory mechanisms of periodontal regeneration. *Microsc Res Tech* 60:491-502.
- Sodek J, Goldberg HA, Domenicucci C, Zhang Q, Kwon B, Maeno M, *et al.* (1989). Characterization of multiple forms of small collagenous apatite-binding proteins in bone. *Connect Tissue Res* 20:233-240.
- Somerman MJ, Archer SY, Imm GR, Foster RA (1988). A comparative study of human periodontal ligament cells and gingival fibroblasts *in vitro*. *J Dent Res* 67:66-70.
- Stahl SS, Slavkin HC (1972). Development of gingival crevicular epithelial and periodontal disease. In: Developmental aspects of oral biology. Slavkin HC, Bavetta L, editors. New York: Academic Press, pp. 326-350.
- Stanishevsky A, Chowdhury S, Chinoda P, Thomas V (2008). Hydroxyapatite nanoparticle loaded collagen fiber composites: microarchitecture and nanoindentation study. *J Biomed Mater Res A* 86:873-882.
- Stavropoulos A, Sculean A, Karring T (2004). GTR treatment of intrabony defects with PLA/PGA copolymer or collagen bioresorbable mem-

- branes in combination with deproteinized bovine bone (Bio-Oss). *Clin Oral Investig* 8:226-232.
- Stevens A, Zuliani T, Olejnik C, LeRoy H, Obriot H, Kerr-Conte J, *et al.* (2008). Human dental pulp stem cells differentiate into neural crest-derived melanocytes and have label-retaining and sphere-forming abilities. *Stem Cell Dev* 17:1175-1184.
- Sugiyama T, Rodriguez RT, McLean GW, Kim SK (2007). Conserved markers of fetal pancreatic epithelium permit prospective isolation of islet progenitor cells by FACS. *Proc Natl Acad Sci USA* 104:175-180.
- Sumanasinghe RD, Bernacki SH, Lobo EG (2006). Osteogenic differentiation of human mesenchymal stem cells in collagen matrices: effect of uniaxial cyclic tensile strain on bone morphogenetic protein (BMP-2) mRNA expression. *Tissue Eng* 12:3459-3465.
- Suzuki O, Kamakura S, Katagiri T, Nakamura M, Zhao B, Honda Y, *et al.* (2006). Bone formation enhanced by implanted octacalcium phosphate involving conversion into Ca-deficient hydroxyapatite. *Biomaterials* 27:2671-2681.
- Takayama S, Murakami S, Miki Y, Ikezawa K, Tasaka S, Terashima A, *et al.* (1997). Effects of basic fibroblast growth factor on human periodontal ligament cells. *J Periodontol Res* 32:667-675.
- Takayama S, Murakami S, Shimabukuro Y, Kitamura M, Okada H (2001). Periodontal regeneration by FGF-2 (bFGF) in primate models. *J Dent Res* 80:2075-2079.
- Takigawa M (2003). CTGF/Hcs24 as a multifunctional growth factor for fibroblasts, chondrocytes and vascular endothelial cells. *Drug News Perspect* 16:11-21.
- Talwar R, Di Silvio L, Hughes FJ, King GN (2001). Effects of carrier release kinetics on bone morphogenetic protein-2-induced periodontal regeneration in vivo. *J Clin Periodontol* 28:340-347.
- Tan SS, Morriss-Kay GM (1986). Analysis of cranial neural crest cell migration and early fates in postimplantation rat chimaeras. *J Embryol Exp Morphol* 98:21-58.
- Taylor B, Wright JF, Arya S, Isenman DE, Shulman MJ, Painter RH (1994). Clq binding properties of monomer and polymer forms of mouse IgM mu-chain variants. Pro544Gly and Pro434Ala. *J Immunol* 153:5303-5313.
- Teare JA, Ramoshebi LN, Ripamonti U (2008). Periodontal tissue regeneration by recombinant human transforming growth factor-beta 3 in *Papio ursinus*. *J Periodontol Res* 43:1-8.
- Temenoff JS, Mikos AG (2000). Injectable biodegradable materials for orthopedic tissue engineering. *Biomaterials* 21:2405-2412.
- Ten Cate AR (1969). The biology of the periodontium. Melcher AR, Bowen WH, editors. New York: Academic Press, pp. 53-90.
- Ten Cate AR (1996). The role of epithelium in the development, structure and function of the tissues of tooth support. *Oral Dis* 2:55-62.
- Terranova VP, Odziemiec C, Tweden KS, Spadone DP (1989). Repopulation of dentin surfaces by periodontal ligament cells and endothelial cells. Effect of basic fibroblast growth factor. *J Periodontol* 60:293-301.
- Thomas HF (1995). Root formation. *Int J Dev Biol* 39:231-237.
- Trainor PA, Krumlauf R (2001). Hox genes, neural crest cells and branchial arch patterning. *Curr Opin Cell Biol* 13:698-705.
- Trentin A, Glavieux-Pardanaud C, Le Douarin NM, Dupin E (2004). Self-renewal capacity is a widespread property of various types of neural crest precursor cells. *Proc Natl Acad Sci USA* 101:4495-4500.
- Tsarovina K, Schellenberger J, Schneider C, Rohrer H (2008). Progenitor cell maintenance and neurogenesis in sympathetic ganglia involves Notch signaling. *Mol Cell Neurosci* 37:20-31.
- Valero A, Merino F, Wolbers F, Luttge R, Vermes I, Andersson H, *et al.* (2005). Apoptotic cell death dynamics of HL60 cells studied using a microfluidic cell trap device. *Lab Chip* 5:49-55.
- Veis A (2003). Amelogenin gene splice products: potential signaling molecules. *Cell Mol Life Sci* 60:38-55.
- Wang HL, MacNeil RL (1998). Guided tissue regeneration. Absorbable barriers. *Dent Clin North Am* 42:505-522.
- Wikesjö UM, Xiropaidis AV, Thomson RC, Cook AD, Selvig KA, Hardwick WR (2003). Periodontal repair in dogs: rhBMP-2 significantly enhances bone formation under provisions for guided tissue regeneration. *J Clin Periodontol* 30:705-714.
- Wikesjö UM, Sorensen RG, Kinoshita A, Jian LX, Wozney JM (2004). Periodontal repair in dogs: effect of recombinant human bone morphogenetic protein-12 (rhBMP-12) on regeneration of alveolar bone and periodontal attachment. *J Clin Periodontol* 31:662-670.
- Xu HH, Takagi S, Sun L, Hussain L, Chow LC, Guthrie WF, *et al.* (2006). Development of a nonrigid, durable calcium phosphate cement for use in periodontal bone repair. *J Am Dent Assoc* 137:1131-1138.
- Xu X, Bringas P Jr, Soriano P, Chai Y (2005). PDGFR-alpha signaling is critical for tooth cusp and palate morphogenesis. *Dev Dyn* 232:75-84.
- Yamaai T, Nakanishi T, Asano M, Nawachi K, Yoshimichi G, Ohyama K, *et al.* (2005). Gene expression of connective tissue growth factor (CTGF/CCN2) in calcifying tissues of normal and cbfa1-null mutant mice in late stage of embryonic development. *J Bone Miner Metab* 23:280-288.
- Yeo YJ, Jeon DW, Kim CS, Choi SH, Cho KS, Lee YK, *et al.* (2005). Effects of chitosan nonwoven membrane on periodontal healing of surgically created one-wall intrabony defects in beagle dogs. *J Biomed Mater Res B Appl Biomater* 72:86-93.
- Yeong WY, Chua CK, Leong KF, Chandrasekaran M (2004). Rapid prototyping in tissue engineering: challenges and potential. *Trends Biotechnol* 22:643-652.
- Yokoi T, Saito M, Kiyono T, Iseki S, Kosaka K, Nishida E, *et al.* (2007). Establishment of immortalized dental follicle cells for generating periodontal ligament in vivo. *Cell Tissue Res* 327:301-311.
- Zaman KU, Sugaya T, Kato H (1999). Effect of recombinant human platelet-derived growth factor-BB and bone morphogenetic protein-2 application to demineralized dentin on early periodontal ligament cell response. *J Periodontol Res* 34:244-250.
- Zeichner-David M, Oishi K, Su Z, Zakartchenko V, Chen LS, Arzate H, *et al.* (2003). Role of Hertwig's epithelial root sheath cells in tooth root development. *Dev Dyn* 228:651-663.
- Zhang C, Chang J, Sonoyama W, Shi S, Wang CY (2008). Inhibition of human dental pulp stem cell differentiation by Notch signaling. *J Dent Res* 87:250-255.
- Zhang J, Duan X, Zhang H, Deng Z, Zhou Z, Wen N, *et al.* (2006). Isolation of neural crest-derived stem cells from rat embryonic mandibular processes. *Biol Cell* 98:567-575.
- Zhang Y, Venugopal JR, El-Turki A, Ramakrishna S, Su B, Lim CT (2008). Electrospun biomimetic nanocomposite nanofibers of hydroxyapatite/chitosan for bone tissue engineering. *Biomaterials* 29:4314-4322.
- Zhang YF, Cheng XR, Chen Y, Shi B, Chen XH, Xu DX, *et al.* (2007). Three-dimensional nanohydroxyapatite/chitosan scaffolds as potential tissue engineered periodontal tissue. *J Biomater Appl* 21:333-349.
